# Supplementary material
Source: PubMed Central journal article supplement (PMC2336859)
Supplement: JCI0832691sd.pdf [file JCI0832691sd.pdf]

# Figure legend for S1 and S2

- S1. Adiponectin receptor 2 protein present in liver but not kidney and podocytes.** Total cell lysate protein (100  $\mu$ g) from mouse liver, kidney and differentiated podocytes were resolved on SDS-PAGE and immunoblotted with antibody to Adipo R2 (Alpha Diagnostics). The membrane was stripped and immunoblotted with antibody to  $\beta$ -actin to verify equal loading.
- S2. Kidney Nox4 mRNA levels were increased in Ad-/- kidneys and reduced with gAd treatment.** Nox4 gene expression in kidneys of wild type, Ad-/-, and Ad-/- mice treated with gAd was measured by real time PCR. (Data presented as % control, \* $p < 0.05$  vs WT, \*\* $p < 0.05$  vs Ad-/-, mean  $\pm$  SEM, n =5 per group).

# Supplemental Data

S1

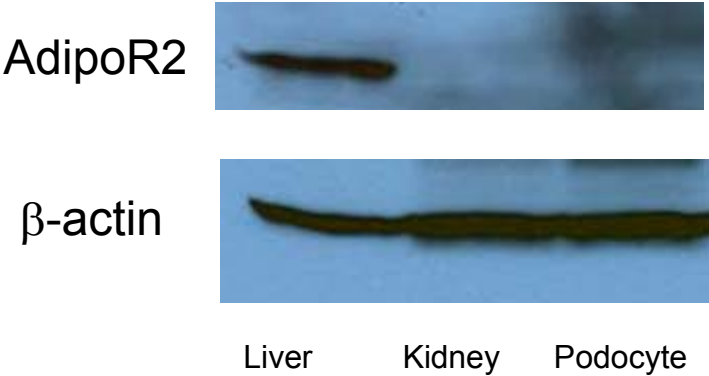

S2

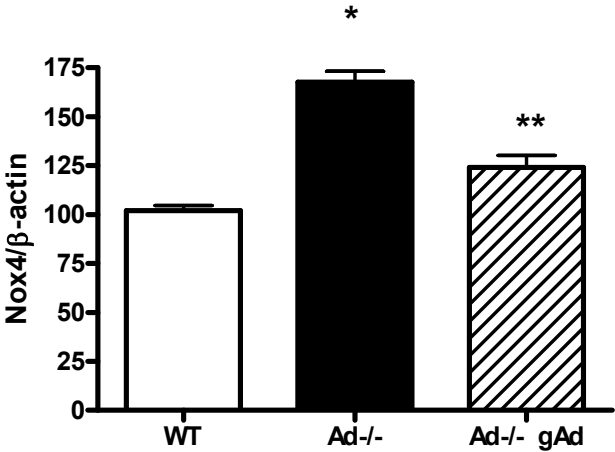

## Supplement to methods:

The primers for mouse AdipoR1, AdipoR2, Nox1, Nox2, Nox4 and  $\beta$ -actin are as follows:

AdipoR1:For; GTT TGC CAC TCC CAA GCA C,  
Rev; GTA AAG TGC ATG GTG GGT AC, Probe;  
Fam AC CAC TCA AGC CAA GTC CCA GGA AC  
Tamra

AdipoR2: For; CCT GGC AAA TGT GAC ATC TG,  
Rev; CGT GGA AGT GAA CAA AGG CA, Probe;  
Fam CA CTC TCA TCA GCT CTT CCA CAT CTT  
TG Tamra

Nox1: Forward; CTT TTA TCG CTC CCA GCA GA,  
Reverse; CTC GCT TCC TCA TCT GCA AT,  
Probe; Fam CG TGA TTA CCA AGG TTG TCA  
TGA ACC CA Tamra

Nox2: Forward; TGC CAC CAG TCT GAA ACT CA,  
Reverse ; CAG CAG GTC TGC AAA CCA CT,  
Probe; Fam AG GCA TGC GTG TCC CTG CAC  
AGC CA Tamra

Nox4: Forward; AGT AGT AGG AGA CTG GAC AG,  
Reverse; AAT GAA GGG CAG AAT CTC AGA,  
Probe ; Fam TC CGG GAT TTG CTA CTG CCT  
CCA TCA AG Tamra

beta-actin: Forward; AAG AGC TAT AGA CTG CCT  
GA, Reverse; ACG GAT GTC AAC GTC ACA CT,  
Probe ; Fam CA CTA TTG GCA ACG AGC GGT  
TCC G Tamra
